# Supplementary material for: Co-translational assembly of mammalian nuclear multisubunit complexes
Source: PubMed Central journal article supplement (PMC6465333; doi:10.1038/s41467-019-09749-y), 2019-04-15
Supplement: 41467_2019_9749_MOESM1_ESM.pdf [file 41467_2019_9749_MOESM1_ESM.pdf]

## Supplementary Information (Figures and Tables)

### Co-translational assembly of mammalian nuclear multisubunit complexes

**Ivanka Kamenova**<sup>1,2,3,4,#</sup>, **Pooja Mukherjee**<sup>1,2,3,4,#</sup>, **Sascha Conic**<sup>1,2,3,4</sup>, **Florian Mueller**<sup>5</sup>,  
**Farrah El-Saafin**<sup>1,2,3,4</sup>, **Paul Bardot**<sup>1,2,3,4</sup>, **Jean-Marie Garnier**<sup>1,2,3,4</sup>, **Doulaye Dembele**<sup>1,2,3,4</sup>,  
**Simona Capponi**<sup>6</sup>, **H.T. Marc Timmers**<sup>6</sup>, **Stéphane D. Vincent**<sup>1,2,3,4</sup>, and **László Tora**<sup>1,2,3,4,\*</sup>

<sup>1</sup>Institut de Génétique et de Biologie Moléculaire et Cellulaire, Illkirch, France;

<sup>2</sup>Centre National de la Recherche Scientifique, UMR7104, Illkirch, France;

<sup>3</sup>Institut National de la Santé et de la Recherche Médicale, U1258, Illkirch, France;

<sup>4</sup>Université de Strasbourg, Illkirch, France;

<sup>5</sup>Computational Imaging & Modeling Unit, Institut Pasteur, Département Biologie Cellulaire et Infections, 25-28 rue du Docteur Roux, 75015 Paris, France;

<sup>6</sup>German Cancer Consortium (DKTK) partner site Freiburg, German Cancer Research, Center (DKFZ) and Department of Urology, Medical Center-University of Freiburg, Germany.

<sup>#</sup>These authors contributed equally

\*Correspondence should be addressed to L.T. [laszlo@igbmc.fr](mailto:laszlo@igbmc.fr)

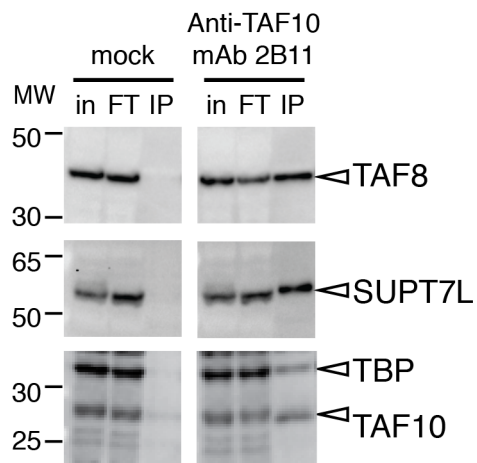

### Supplementary Figure 1

Western blot analysis of immunoprecipitations from E14 mESC whole cell extract using mock (anti-GST) or anti-TAF10 (6TA 2B11) antibodies. 6TA 2B11 recognizes the N-terminal unstructured region of TAF10. Blots were probed with antibodies against the indicated proteins. In = input, FT = flow-through, IP = eluate from IP. Molecular weight (MW) markers are shown in kDa. Source data provided as a Source Data File.

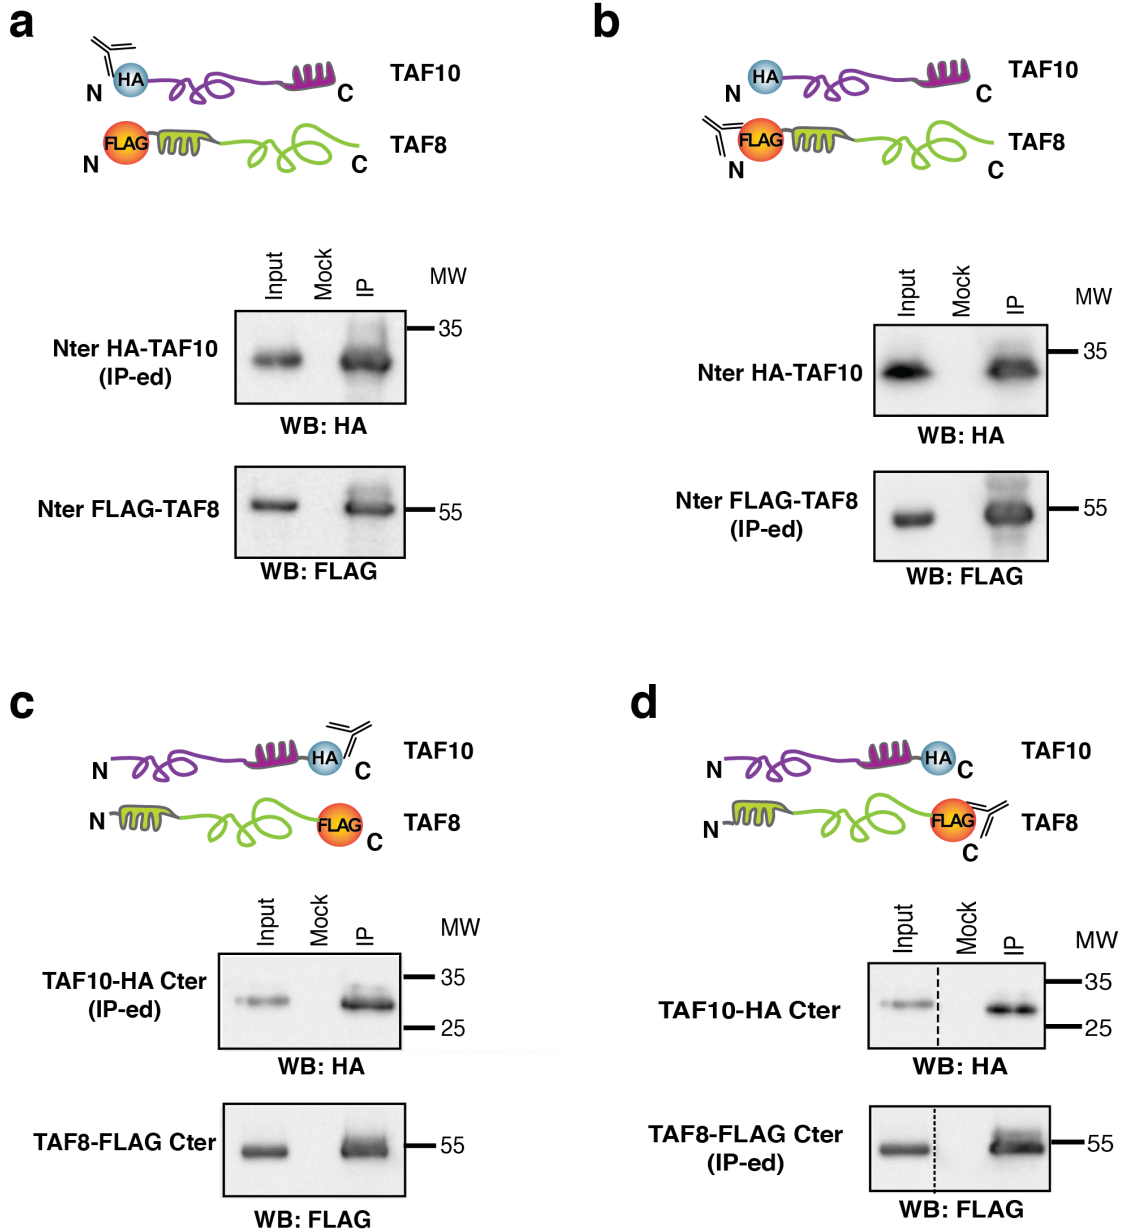

### Supplementary Figure 2

**(a-d)** Western blot analyses of RIPs analysed in Fig. 2. HeLa cells transfected with expression constructs for N terminal (**a-b**) or C terminal (**c-d**) tagged HA-TAF10 and FLAG-TAF8 proteins. Blots were probed with anti-FLAG M2 and anti-HA antibodies as indicated. Molecular weight (MW) markers are shown in kDa. In = input, FT = flow-through, IP = eluate from IP. Molecular weight (MW) markers are shown in kDa. Source data provided as a Source Data File.

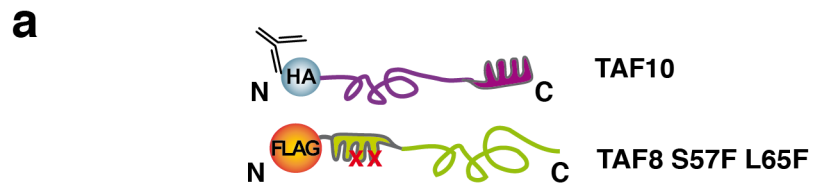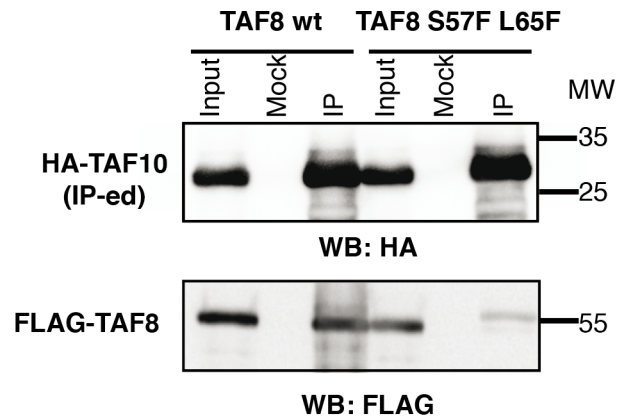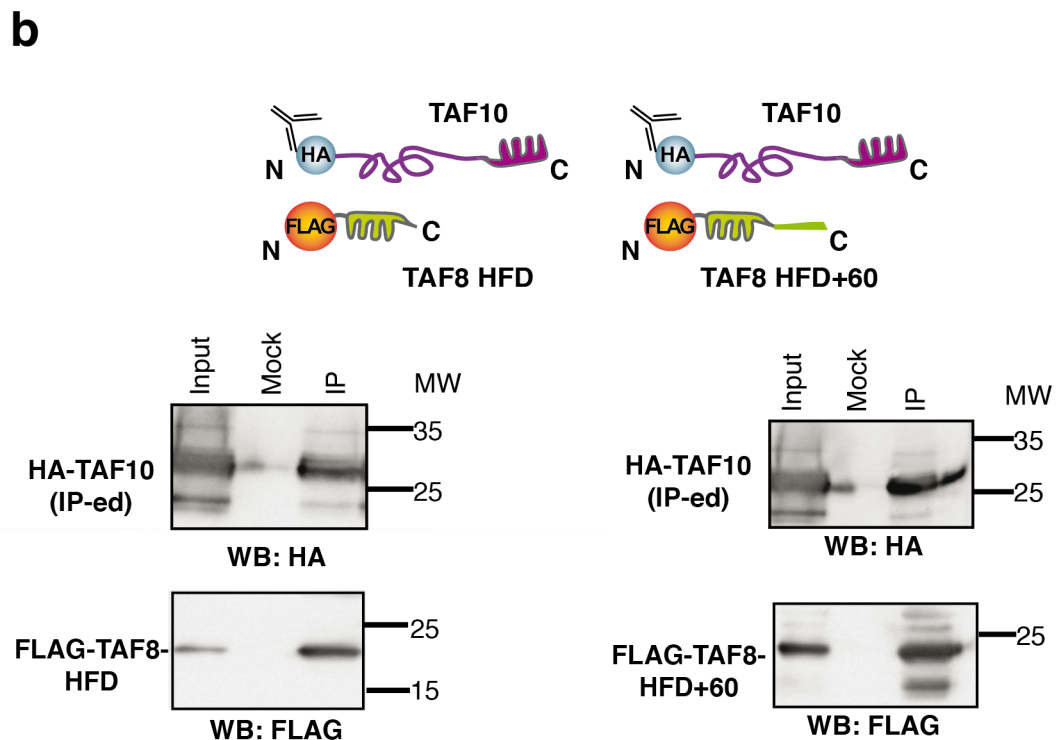

### Supplementary Figure 3

Western blot analyses of RIPs analysed in Fig. 3. Blots were probed with anti-HA and anti-FLAG M2 antibodies as indicated. HeLa cells transfected with expression constructs coding for HA-TAF10 and mutant FLAG-TAF8 S57F L65F proteins (**a**) and coding for HA-TAF10 and minimal TAF8 HFD (left) or TAF8 HFD extended with 60 amino acids (TAF8 HFD+60, right) (**b**). Molecular weight (MW) markers are shown in kDa. In = input, FT = flow-through, IP = eluate from IP. Molecular weight (MW) markers are shown in kDa. Source data provided as a Source Data File.

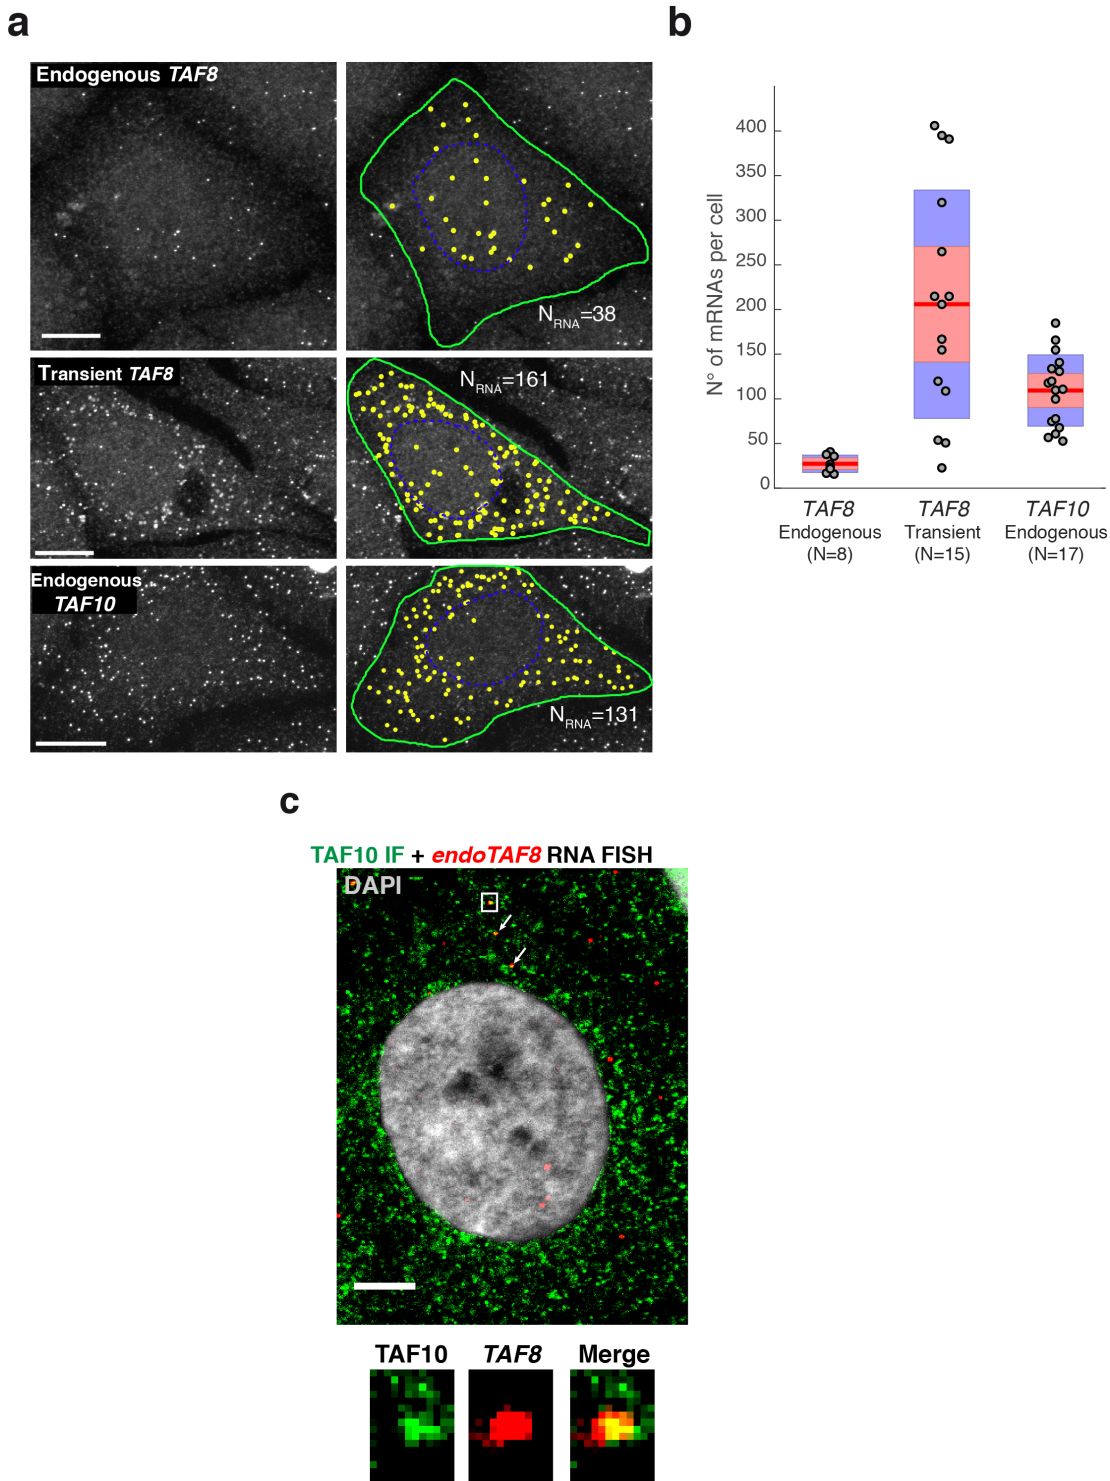

### Supplementary Figure 4

(a) Representative single colour smiFISH images with Cy3-labelled probes recognizing the indicated mRNAs. Z projections of confocal images are shown. On the right, the cell boundaries are shown in green and the nuclei in blue. Scale bars are 10  $\mu$ m in each case. RNAs were detected with FISH-quant. N indicates the number of mRNA molecules in the cytoplasm of each individual cell. (b) Boxplot showing the comparison of the number ( $N^\circ$ ) of mRNAs under the conditions tested (as indicated). Each grey dot represents one cell. Red horizontal lines are mean values, 95% confidence interval is shown in pink, and standard deviation in blue. N = number of cells counted. (c) IF-smiFISH images of HeLa cells expressing either endogenous (*endo*) *TAF8* mRNA or TAF10 protein. Labels: red, Cy3-labelled *TAF8* probes; green, Alexa-488 labelled secondary antibody for TAF10 protein; co-localizing spots are indicated with white arrows. A typical cell counterstained with DAPI (grey) is shown. The nuclear signal in the green channel (TAF10 IF) was removed by masking the nucleus and using the “clear” option in ImageJ. Zoom-in regions shown are indicated with a white rectangle. Scale bar (5  $\mu$ m).

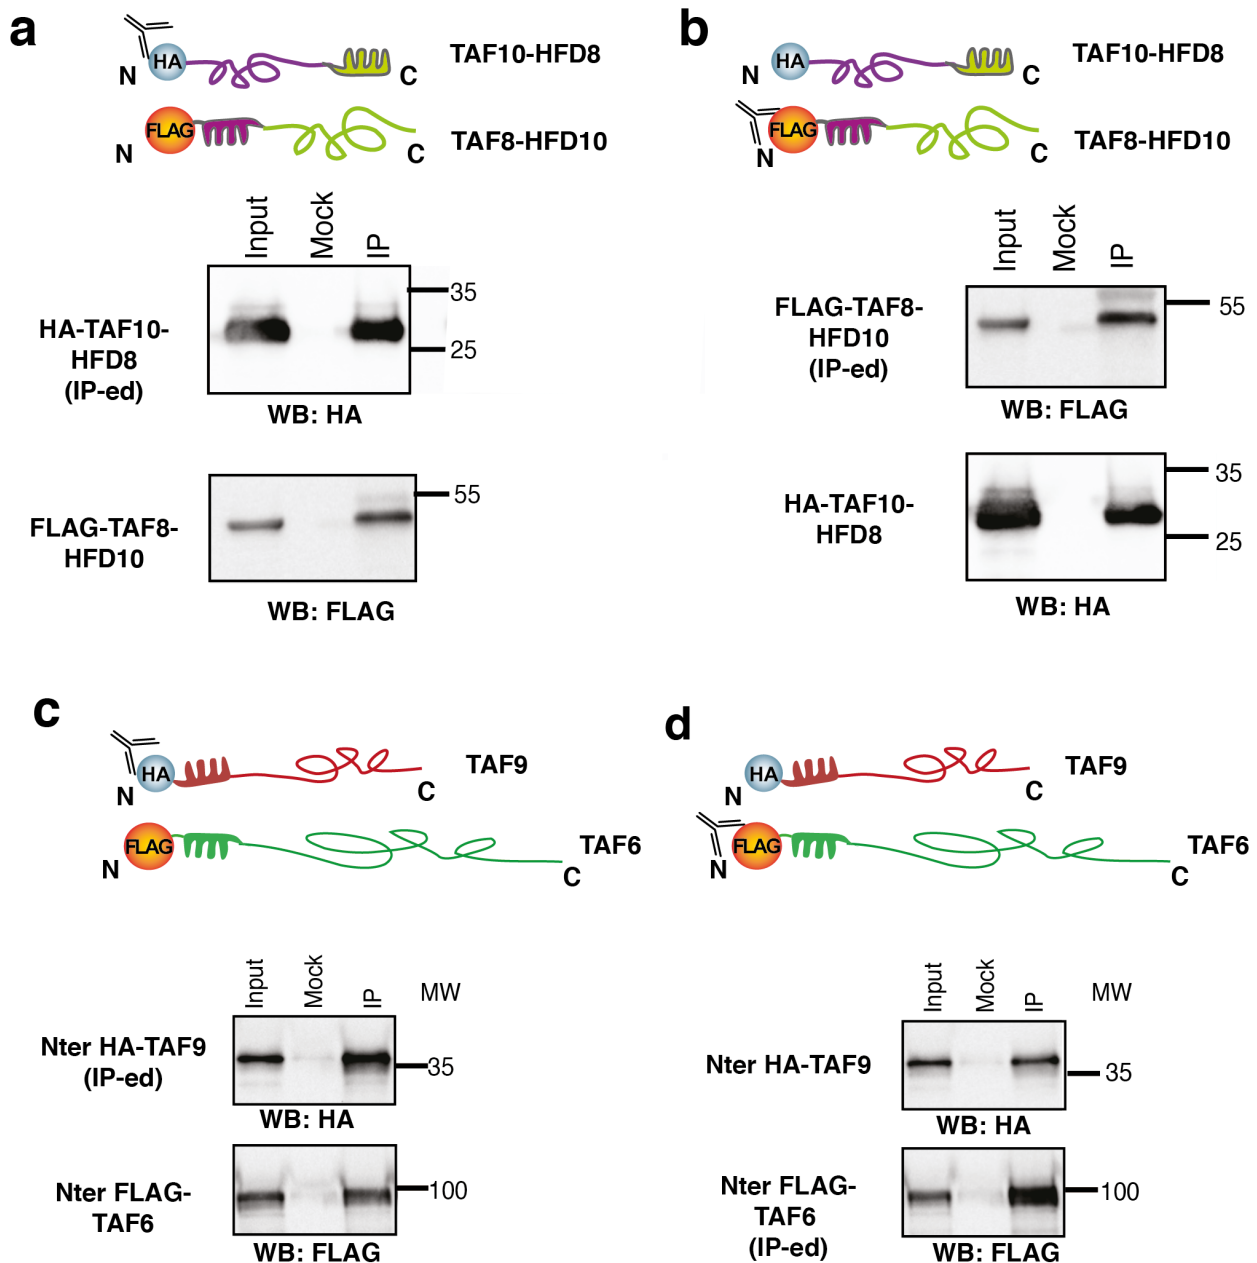

### Supplementary Figure 5

Western blot analyses of RIPs from polysome extracts corresponding to Fig. 6 (a-d). HeLa cells transfected with expression constructs coding for HFD domain-swapped TAF10 and TAF8 (a-b) and with expression constructs coding for TAF6 and TAF9 (c-d). Blots were probed with anti-FLAG M2 and anti-HA antibodies as indicated. Molecular weight (MW) markers are shown in kDa. In = input, FT = flow-through, IP = eluate from IP. Source data provided as a Source Data File.

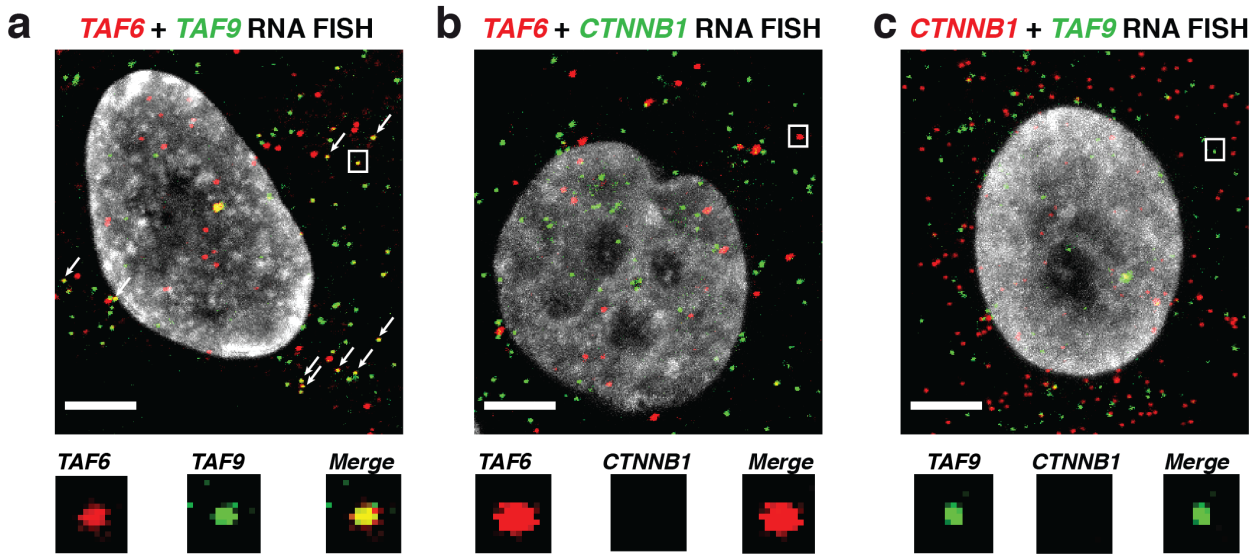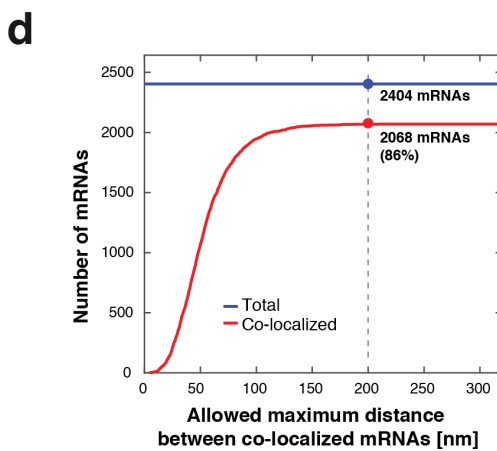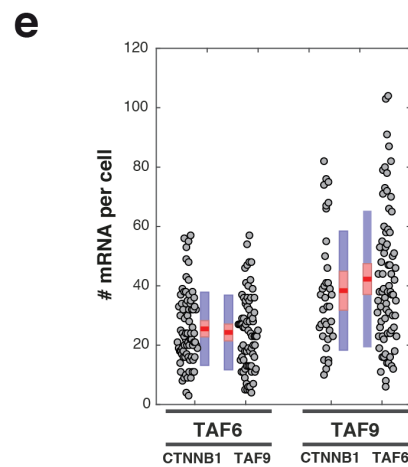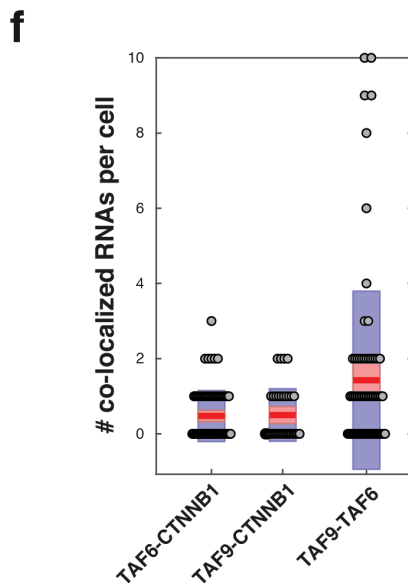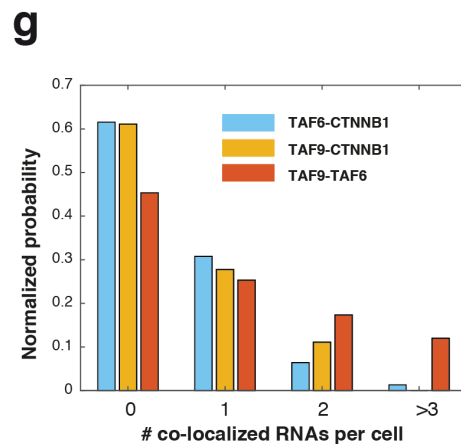

### Supplementary Figure 6

Representative dual colour smFISH images with (a) Cy3-labelled *TAF6* and digoxigenin (DIG)-labelled *TAF9* probes, (b) Cy3-labelled *TAF6* and DIG-labelled *CTNNB1* probes, (c) Cy3-labelled *CTNNB1* and DIG-labelled *TAF9* probes. The DIG labelled probes were then detected with fluorescein-labelled anti-digoxigenin antibodies. Co-localizing spots are indicated with white arrows.

A typical cell recorded in each case and after counterstaining the nucleus with DAPI (grey) is shown. The nuclear signal was masked using the “clear” option in ImageJ. Zoom-in regions shown under every image are indicated with a white rectangle. Scale bar: 5  $\mu$ m. **(d)** Analysis to determine allowed distance threshold for two RNAs to be considered co-localized. Probe-pool for *TAF9* was split in two and labelled with two different colours. Co-localization between these two channels was determined for different distance threshold. Co-localization reaches a plateau at around 200 nm, with co-localization percentage of 85%. Both, distance threshold and co-localization percentage are in similar to earlier studies (Tsanov et al. 2016). **(e)** Comparison of RNA expression levels per cell for TAF6 and TAF9 in either the respective negative control experiments (against *CTNNB1*), or the *TAF6-TAF9* co-localization experiment. Plot shows that detected expression levels are similar. **(f)** Number of co-localized RNAs per cell. Shows significant increase of co-localization in *TAF6-TAF9* experiments compared to negative controls. In panels (e-f), each grey dot represents one cell. Red horizontal lines are mean values, 95% confidence interval is shown in pink, and standard deviation in blue. **(g)** Same data as in (f) but shown as a histogram. Only in the *TAF6-TAF9* experiments a substantial number of cells have more than 2 co-localized RNAs per cell.



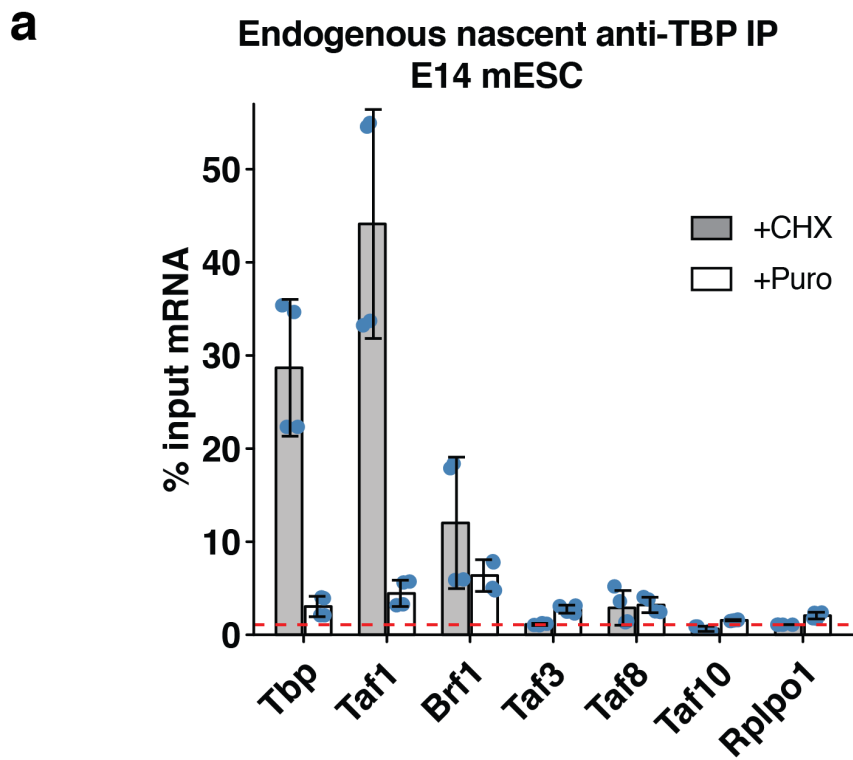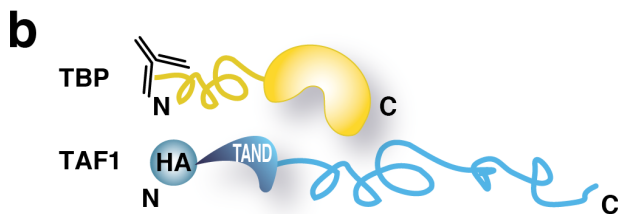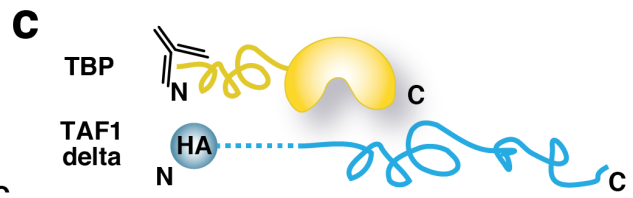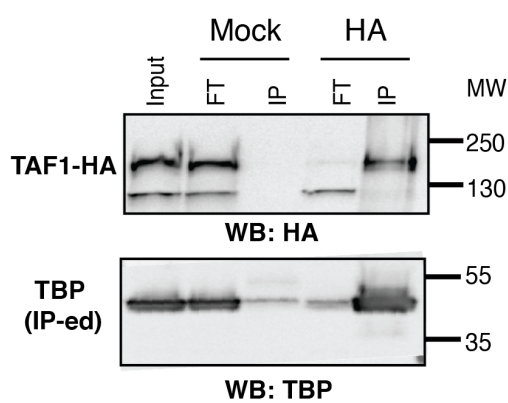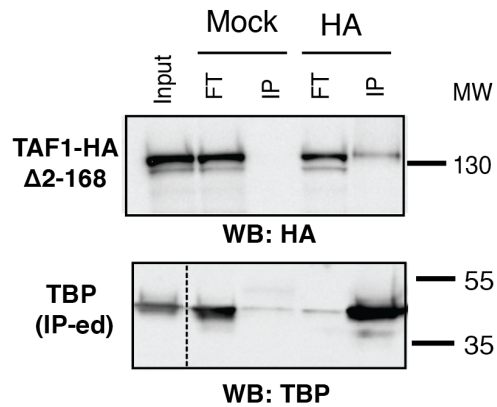

### Supplementary Figure 7

(a) RIP-qPCR using TBP antibody from mESC polysome extracts. Values are expressed mean  $\pm$  S.D. from 2 biological replicates and two technical replicates (represented by blue dots). (b-c) Western blot analyses of RIPs with TBP antibody from polysome extracts corresponding to Fig. 7(c-d). (b) HeLa cells transfected with expression constructs coding for TBP and wild type HA-TAF1, (c) HeLa cells transfected with expression constructs coding for TBP and HA-TAF1 with N-terminal deletion of the first 168 amino acids. Molecular weight (MW) markers are shown in kDa. In = input, FT = flow-through, IP = eluate from IP. Source data provided as a Source Data File.

## Supplementary Tables

**Supplementary Table 1: primers used in this study**

| gene                 | organism    | name                                | sequence                                             |
|----------------------|-------------|-------------------------------------|------------------------------------------------------|
| <i>TBP</i>           | human       | hTBP1-F<br>hTBP1-R                  | TCATACCGTGCTGCTATCT<br>CTCCCTCAAACCAACTTGTC          |
| <i>TAF1</i>          | human       | hTAF1-F<br>hTAF1-R                  | TTTGTACCTGCCTTGTTC<br>GCCATCTTTCAGTCTCATC            |
| <i>TAF2</i>          | human       | hTAF2-F<br>hTAF2-R                  | CATGTGTACCGCCAAAGT<br>GCAGTTGCTTCTGTGTAAATC          |
| <i>TAF3</i>          | human       | hTAF3-2F<br>hTAF3-2R                | GACGACTGCGATGACTGGTA<br>CTTCTTGTTTCGCACACTTGG        |
| <i>TAF5</i>          | human       | hTAF5_F_558<br>hTAF5_R_627          | AGTTGGAAGTGTTGCTGTGG<br>TCCTTGTTGGTTGTAGGCTGAC       |
| <i>TAF6</i>          | human       | hTAF6_264_352_F<br>hTAF6_264_352_R  | CCAGGAGTTCATTCTTTCC<br>TGATGTCGCTCAGATCAACC          |
| <i>TAF7</i>          | human       | hTAF7_F_76<br>hTAF7_R_164           | TCTACTGTGAGAAGGGCAGTAC<br>ATTCCATGACGCCCATCAGG       |
| <i>TAF8</i>          | human       | hTAF8-3F<br>hTAF8-3R                | ACAGAGGCAGGGTTTGAGAGT<br>AGACTTGGCACTTCTCCCAAT       |
| <i>TAF9</i>          | human       | hTAF9_F<br>hTAF9_R                  | GGAGTTTGCCTTCCGATATG<br>CGCACATCATCTGCATCAAC         |
| <i>TAF10</i>         | human/mouse | TAF10s<br>TAF10as                   | TGCCAATGATGCCCTACAGC<br>AGGGCAGGGGTCAAGTCCTC         |
| <i>SPT7L</i>         | human       | hSPT7L-3F<br>hSPT7L-3R              | AGAATCCCAATGCACCATTC<br>GCCAGCTGAGTTCAGTCACA         |
| <i>BRF1</i>          | human       | BRF1-2F<br>BRF1-2R                  | GAGGTGCAGTTCGTGGAGAG<br>CTCTCGACTCCTTCCCCAGA         |
| <i>BTA1</i>          | human       | BTA1-1F<br>BTA1-1R                  | CCCTCAGGTCCAACAATGCA<br>GGCCAGACACGTGGAATAA          |
| <i>TAF8_deletion</i> | human       | FLAG_F<br>TAF8_HFD_R                | GACATCGATTACAAGGATG<br>AGGGTTAGTGGACTGTTTA           |
| <i>TAF1_deletion</i> | human       | TAF1_HA_F<br>TAF1_HA_R              | CTACGACGTGCCCGACTAC<br>GGCAATGATGGAGGGCAAGA          |
| <i>PPIB</i>          | human       | Cyclopillin B s<br>Cyclopillin B as | CCGAACGCAACATGAAGGTG<br>ACCAAAGATCACCCGGCCTA         |
| <i>GAPDH</i>         | human       | GAPDH-2F<br>GAPDH-2R                | TCGACAGTCAGCCGCATCTTCTTT<br>ACCAAATCCGTTGACTCCGACCTT |
| <i>ENY2</i>          | human       | ENY2_fw<br>ENY2_rev                 | GGAGAAAGAGAACGCCTCAA<br>AGTGATTCAGCCACCAAGTCA        |
| <i>GANP</i>          | human       | GANP_fw<br>GANP_rev                 | CACGAGCCAGCAGCAGAAGTTC<br>CATCCTGTATCGTCCGACCA       |
| <i>CETN2</i>         | human       | CENTR2_fw<br>CENTR2_rev             | GGACAGGAAAATGAACTTTGGTGA<br>GGCCACGCGTTTCAGATTTT     |
| <i>CETN3</i>         | human       | CENTR3_fw                           | AGAGCCTTGGGGTTTCATGTAA                               |

|                            |             |                                  |                                                  |
|----------------------------|-------------|----------------------------------|--------------------------------------------------|
|                            |             | CENTR3_rev                       | TTCTTCATGGGGATCTCTCTTTCC                         |
| <i>ATXN7L3</i>             | human       | ATXN7L3_fw<br>ATXN7L3_rev        | CTGGGAATGGGTTCGGAACAG<br>CCGAGCCATAGGACCAGTCG    |
| <i>ATXN7</i>               | human       | ATXN7_fw<br>ATXN7_rev            | GCGAAGTCATGGGGCTCTGT<br>TTGAAATGCCTGCGGTTTGA     |
| <i>USP22</i>               | human       | USP22_fw<br>USP22_rev            | TTGCAGATGCCTTTCTGTG<br>TAGAAAACCGCGAGATGCTT      |
| <i>Tbp</i>                 | mouse       | TBP_mouse_F1<br>TBP_mouse_R1     | AGCAACAAAGACAGCAGCAG<br>CTGTGTGGGTTGCTGAGATG     |
| <i>Taf1</i>                | mouse       | TAF1_mouse_F1<br>TAF1_mouse_R1   | TGGAGATGGTGTCTTGCAG<br>TCCTCATCATCTTCGCCTTC      |
| <i>Taf3</i>                | mouse       | TAF3_mouse_F1<br>TAF3_mouse_R1   | TGCTGGCTCCATTTGCAAAG<br>TTTTCTGACCTGGAGAGCTAGC   |
| <i>Taf8</i>                | mouse       | TAF8_mouse_F1<br>TAF8_mouse_R1   | ATATCAGCACGGACGATTCC<br>GGTTATCGATGACGCTCTCC     |
| <i>Taf10</i>               | human/mouse | TAF10s<br>TAF10as                | TGCCAATGATGCCCTACAGC<br>AGGGCAGGGGTCAAGTCCTC     |
| <i>Spt7l</i>               | mouse       | Spt7 NMD F<br>Spt7 NMD R         | GGAGCATTGGGATTTTTACAGT<br>TGTGAAGGCTGAAGAGAGTGAA |
| <i>Brf1</i>                | mouse       | BRF1_mouse_F1<br>BRF1_mouse_R1   | AGTATCCATGACAGCCTTGAGG<br>TGCAACCAAAGTGCTGCTC    |
| <i>Rplp0<sup>l</sup></i>   | mouse       | RPLP0_mouse_F1<br>RPLP0_mouse_R1 | TTCTGAGTGATGTGCAGCTG<br>GGAGATGTTTCAGCATGTTTCAGC |
| <i>Gapdh</i>               | mouse       | mGapdh_F<br>mGapdh_R             | TTCACCACCATGGAGAAGGC<br>CCCTTTTGGCTCCACCCT       |
| <i>Taf8_2</i>              | mouse       | mTaf8_F<br>mTaf8_R               | GAGCTCCTTGCTGACAGAGG<br>GCACTTCTCCCGATTTCTGA     |
| <i>Taf10_2<sup>l</sup></i> | mouse       | mTaf10_F<br>mTaf10_R             | CCACGCATAATTTCGGCTCAT<br>CCTCCATGGTTAGGTGTA      |

**Supplementary Table 2: antibodies used in this study**

| Name         | Type                                         | Antigen          | Purpose                               | Dilution                                                                    | Source                                        |
|--------------|----------------------------------------------|------------------|---------------------------------------|-----------------------------------------------------------------------------|-----------------------------------------------|
| 23TA-1H8     | mouse monoclonal, ascites                    | hTAF10 aa 1-20   | RIP (human)                           | 2 µl ascites for 20 µl Protein G Dynabeads                                  | Wieczorek <i>et al</i> , 1998 <sup>2</sup>    |
| 6TA-2B11     | mouse monoclonal, ascites                    | hTAF10 aa 89-100 | RIP (mouse), protein IP, western blot | 2 µl ascites for 20 µl Protein G Dynabeads (RIP, protein IP)<br>1:1000 (WB) | Mohan <i>et al</i> , MCB, 2003 <sup>3</sup>   |
| 3TF1-3G3     | mouse monoclonal, ascites                    | hTBP aa 1-18     | RIP (human, mouse), western blot      | 2 µl ascites for 20 µl Protein G Dynabeads (RIP)<br>1:1000 (WB)             | Brou <i>et al</i> , EMBO J, 1993 <sup>4</sup> |
| 3F10         | rat monoclonal                               | HA               | western blot                          | 1:500                                                                       | Roche (Sigma) cat #: 11867423001              |
| anti-FLAG M2 | mouse monoclonal, affinity purified          | FLAG             | western blot                          | 1:2000                                                                      | Sigma, F1804                                  |
| #2440        | rabbit polyclonal, antigen affinity purified | hTAF1            | western blot                          | 1:1000                                                                      | Choukrallah <i>et al</i> , 2011 <sup>5</sup>  |
| #2325        | rabbit polyclonal, antigen affinity purified | ATXN7L3          | western blot                          | 1:1000                                                                      | Zhao <i>et al</i> 2008 <sup>6</sup>           |
| ab113295     | rabbit polyclonal                            | hGANP            | western blot                          | 1:500                                                                       | Abcam                                         |
| SUPT7L       | rabbit polyclonal, antigen affinity purified | SUPT7L           | western blot                          | 1:5000                                                                      | Bethyl, A302-803A                             |
| #3478        | rabbit polyclonal, antigen affinity purified | TAF8             | western blot                          | 1:1000                                                                      | Bardot <i>et al</i> , 2017 <sup>1</sup>       |
| 15-TF2-1D10  | mouse monoclonal, ascites                    | GST              | RIP (human, mouse), protein IP        | 2 µl ascites for 20 µl Protein G Dynabeads                                  | Nagy <i>et al.</i> , 2010 <sup>7</sup>        |
| TUBULIN      | mouse monoclonal                             | TUBULIN          | western blot                          | 1:20000                                                                     | SIGMA-T6557                                   |

**Supplementary Table 3: plasmids used in this study**

| <i>Plasmid</i>                  | <i>Description</i>                                                                                                                 | <i>Source</i>                |
|---------------------------------|------------------------------------------------------------------------------------------------------------------------------------|------------------------------|
| pXJ41-TAF10-Nter-2HA            | Eukaryotic expression plasmid containing 2HA-hTAF10 for N-terminal tagging of hTAF10                                               | Jacq et al,1994 <sup>8</sup> |
| pXJ41-TAF8-Nter-3FLAG           | Eukaryotic expression plasmid containing 3FLAG-hTAF8 for N-terminal tagging of hTAF8                                               | This study                   |
| pXJ41-TAF10-Cter-2HA            | Eukaryotic expression plasmid containing 2HA-hTAF10 for C-terminal tagging of hTAF10                                               | This study                   |
| pXJ41-TAF8-Cter-3FLAG           | Eukaryotic expression plasmid containing 3FLAG-hTAF8 for C-terminal tagging of hTAF8                                               | This study                   |
| pXJ41-TAF9-Nter-2HA             | Eukaryotic expression plasmid containing 2HA-hTAF9 for N-terminal tagging of hTAF9                                                 | This study                   |
| pXJ41-TAF6-Nter-3FLAG           | Eukaryotic expression plasmid containing 3FLAG-hTAF6 for N-terminal tagging of hTAF6                                               | This study                   |
| pXJ41-TAF8-L65F-S57F-Nter-2HA   | Eukaryotic expression plasmid containing N-terminally 3FLAG tagged hTAF8 with two point mutations L65F S57F                        | This study                   |
| pXJ41-TAF8HFD-Nter-3FLAG        | Eukaryotic expression plasmid containing N-terminally 3FLAG tagged histone fold domain of hTAF8                                    | This study                   |
| pXJ41-TAF8HFD60aa-Nter-3FLAG    | Eukaryotic expression plasmid containing N-terminally 3FLAG tagged hTAF8 histone fold domain with its 60 aa extension              | This study                   |
| pXJ41-TAF10(HFD)TAF8-Nter-2HA   | Eukaryotic expression plasmid containing N-terminally 2HA tagged hTAF10 with the histone fold domain replaced with that of hTAF8   | This study                   |
| pXJ41-TAF8(HFD)TAF10-Nter-3FLAG | Eukaryotic expression plasmid containing N-terminally 3FLAG tagged hTAF8 with the histone fold domain replaced with that of hTAF10 | This study                   |
| pXJ41-TBP                       | Eukaryotic expression plasmid containing hTBP                                                                                      | May et al,1996 <sup>9</sup>  |
| pXJ41-TAF1-Nter-HA              | Eukaryotic expression plasmid containing                                                                                           | This study                   |

|                     |                                                                                                  |            |
|---------------------|--------------------------------------------------------------------------------------------------|------------|
|                     | 1HA-hTAF1 for N-terminal tagging of hTAF1                                                        |            |
| pXJ41-ΔTAF1-Nter-HA | Eukaryotic expression plasmid containing N-terminally tagged 1HA-hTAF1, amino acid 2-168 deleted | This study |

#### Supplementary Table 4: smiFISH probes

##### TAF8 probes

| Name            | Probe Sequence (including FLAPY Sequence)                 |
|-----------------|-----------------------------------------------------------|
| hTAF8_YDG30_001 | TCAGGAGAGGGACTTCTTCCTGCGGATTACACTCGGACCTCGTCGACATGCATT    |
| hTAF8_YDG30_002 | TGCAGGACAGAGGTGTTCTCCTTCTCTTACACTCGGACCTCGTCGACATGCATT    |
| hTAF8_YDG30_003 | CTCCAGAATCCTCCATGCTGATATGATTACACTCGGACCTCGTCGACATGCATT    |
| hTAF8_YDG30_004 | AGCAAGGTTCTCTGTGTCTGTCTGTTTATTACACTCGGACCTCGTCGACATGCATT  |
| hTAF8_YDG30_005 | CTGCTCCGAGGAATCTGTCTCTTCCATTACACTCGGACCTCGTCGACATGCATT    |
| hTAF8_YDG30_006 | TGTTGCATCTCCAGTTCAGACGGAAGAAGTTACACTCGGACCTCGTCGACATGCATT |
| hTAF8_YDG30_007 | CTGTCAGGTAGGGGATGGTGAAAGGTCTGTTACACTCGGACCTCGTCGACATGCATT |
| hTAF8_YDG30_008 | AGCAATCAATGGAAATGTGCTGACGTCATTTACACTCGGACCTCGTCGACATGCATT |
| hTAF8_YDG30_009 | TTGGGCTTCTTCACCGGCCGCAGATATTACACTCGGACCTCGTCGACATGCATT    |
| hTAF8_YDG30_010 | TTGAAAAGACTCTGAGTCTCGCCTGTCTTTACACTCGGACCTCGTCGACATGCATT  |
| hTAF8_YDG30_011 | ACGGGCTCACGGTACGTTCGGAGTTTTGTTACACTCGGACCTCGTCGACATGCATT  |
| hTAF8_YDG30_012 | GTAGGTGTGGGGATCAGGGAACCTCAGGATTACACTCGGACCTCGTCGACATGCATT |
| hTAF8_YDG30_013 | TGATTGGTCACCGGAGGAGCAGTGATGTTACACTCGGACCTCGTCGACATGCATT   |
| hTAF8_YDG30_014 | GGTTATCGATGATGTTCTCCTCCCCATTACACTCGGACCTCGTCGACATGCATT    |
| hTAF8_YDG30_015 | CATCCTCTGAGACCGTTTTGCATAAGCTTACACTCGGACCTCGTCGACATGCATT   |
| hTAF8_YDG30_016 | GGAGAGTGTCCACATTGAAACCCATCTTTACACTCGGACCTCGTCGACATGCATT   |
| hTAF8_YDG30_017 | ACAAGTGTGACCACGATATCGGACAGTGTTTACACTCGGACCTCGTCGACATGCATT |
| hTAF8_YDG30_018 | TGGGTCTGGCTGTGTGCTCACAGTATTACACTCGGACCTCGTCGACATGCATT     |
| hTAF8_YDG30_019 | GCTCTGCAGCATCTCTGTCAGCGTTTTTTACACTCGGACCTCGTCGACATGCATT   |
| hTAF8_YDG30_020 | ACGGATGCTTTCTCGGCACTCTCAAATTACACTCGGACCTCGTCGACATGCATT    |

|                 |                                                                |
|-----------------|----------------------------------------------------------------|
| hTAF8_YDG30_021 | TGCCTCTGTCAGCAAGGAGCTCACAATTACACTCGGACCTCGTC<br>GACATGCATT     |
| hTAF8_YDG30_022 | AGGGTTCTCCTCCGGGCCAGATGATATTACACTCGGACCTCGTC<br>GACATGCATT     |
| hTAF8_YDG30_023 | TATCGGCAGGGTTAGTGGACTGTTTACTTCTTACACTCGGACCTC<br>GTCGACATGCATT |
| hTAF8_YDG30_024 | GAAAGTGGGTGATGGGTACATAGGATCTCTTTACACTCGGACCT<br>CGTCGACATGCATT |

### TAF10 probes

| Name             | Probe Sequence (including FLAPY Sequence)                        |
|------------------|------------------------------------------------------------------|
| hTAF10_YDG32_001 | CCATACTCGCTGAGGGCAGGGGTCAATTACACTCGGACCTCGT<br>CGACATGCATT       |
| hTAF10_YDG32_002 | AAGTTTATTATGAAAACAGGCTGGTGTGGGGATTACACTCGGA<br>CCTCGTCGACATGCATT |
| hTAF10_YDG32_003 | CCTCCATGGTTAGAGTGTACTTGCGGTCTTACACTCGGACCTCG<br>TCGACATGCATT     |
| hTAF10_YDG32_004 | CTGCCGGAGGCCGTGCCCTTCATTTTTTACACTCGGACCTCGTC<br>GACATGCATT       |
| hTAF10_YDG32_005 | AGTGCTGTAGGGCATCATTGGCAATATCTTTACACTCGGACCTC<br>GTCGACATGCATT    |
| hTAF10_YDG32_006 | GATGAATTTCTGGGCAGCTAAGGAGATGAGCTTACACTCGGAC<br>CTCGTCGACATGCATT  |
| hTAF10_YDG32_007 | AATTATGCGTGGGTCTGAGGCCTCAAAGCTTACACTCGGACC<br>TCGTCGACATGCATT    |
| hTAF10_YDG32_008 | GCACGGTTCAGGTAGTAACCAGTCACTGCTTACACTCGGACC<br>TCGTCGACATGCATT    |
| hTAF10_YDG32_009 | CTGGGATCGTAGGCGTGTAATCTTCCAGCTTACACTCGGACCTC<br>GTCGACATGCATT    |
| hTAF10_YDG32_010 | CATCAAGAAGTCCACCAAAGGCGTGCTGGTTACACTCGGACCT<br>CGTCGACATGCATT    |
| hTAF10_YDG32_011 | ACCACGGGCTTCACGTCTCCGTTGGCTTACACTCGGACCTCGTC<br>GACATGCATT       |
| hTAF10_YDG32_012 | CGCTCGGCAGTACGTAAACCCCGTTAGATTACACTCGGACCTC<br>GTCGACATGCATT     |
| hTAF10_YDG32_013 | TGGGGACAGATAAGTACATTTAGGTTGGGTGGTTACACTCGGA<br>CCTCGTCGACATGCATT |
| hTAF10_YDG32_014 | CCTTGTTCTCCGCGGCGGTGCTGGAGTTACACTCGGACCTCGTC<br>GACATGCATT       |

|                  |                                                                 |
|------------------|-----------------------------------------------------------------|
| hTAF10_YDG32_015 | CAGGTGAAGTAGTGCGGCTTCTTCACATTGATTACACTCGGACC<br>TCGTCGACATGCATT |
|------------------|-----------------------------------------------------------------|

### TAF6 probes

| Name    | Probe Sequence (including FLAPY Sequence)                       |
|---------|-----------------------------------------------------------------|
| TAF6_1  | ATGTACTTCTGGACACTCCCAGGACCTTACACTCGGACCT<br>CGTCGACATGCATT      |
| TAF6_2  | CCAAGGGACCCGAATTCTGCCCGATATTACACTCGGACCT<br>CGTCGACATGCATT      |
| TAF6_3  | CACATGGTCTGCTCCAATCCGGTCAATTTACACTCGGACC<br>TCGTCGACATGCATT     |
| TAF6_4  | TGATAACATCGTGTCCCAGCTCAGCCTTACACTCGGACCT<br>CGTCGACATGCATT      |
| TAF6_5  | AACTGTCTGCTCACGATGCAGGTCATCTTACACTCGGACC<br>TCGTCGACATGCATT     |
| TAF6_6  | AGCTGGAATCAGCTCATGGACGTATTTTTCTTTACACTCG<br>GACCTCGTCGACATGCATT |
| TAF6_7  | AGGTTGTTCTGAACCACGTTACACGGACTTACACTCGGACCTCGTCGACA<br>TGCATT    |
| TAF6_8  | CTGCTGCTCCACAGACAACCTCGTGGATTACACTCGGACCTCGTCGACATGC<br>ATT     |
| TAF6_9  | CTCAGATCAACCTCCTTCTCCTCATAGTTACACTCGGACCTCGTCGACATGC<br>ATT     |
| TAF6_10 | TGAACTCCTGGGCGTGAAGCCATAGATTACACTCGGACCTCGTCGACATG<br>CATT      |
| TAF6_11 | GCTGGGAGCCATTGGCTTTTGGAGTCCTTACACTCGGACCTCGTCGACATG<br>CATT     |
| TAF6_12 | TTCTCGTCCACCCAGCTCTTGGTGAATTACACTCGGACCTCGTCGACATGCA<br>TT      |
| TAF6_13 | TCTTGGTGATCCGGGACTGGATGTTGTTAGTTTACACTCGGACCTCGTCGAC<br>ATGCATT |
| TAF6_14 | AGTGATTGTCCACATCTGGTCGCAGGCTTACACTCGGACCTCGTCGACATG<br>CATT     |
| TAF6_15 | ATAGAGCGTGGGGTTGTCCATCAGCGCTTACACTCGGACCTCGTCGACATG<br>CATT     |
| TAF6_16 | CCTCCGAGATAAAGGTACTGAACCGTGGCTTACACTCGGACCTCGTCGACA<br>TGCATT   |
| TAF6_17 | CATCTGATACAGTCCAGGGTCCGTGGCTTACACTCGGACCTCGTCGACATG<br>CATT     |



|         |                                                           |
|---------|-----------------------------------------------------------|
| TAF6_18 | GGCTTGGCTGACTTCAGGGGTTCTGTGTTACACTCGGACCTCGTCGACATGCATT   |
| TAF6_19 | TTCAGCCTTCTGTTGCTCTTTGGGAGCTTACACTCGGACCTCGTCGACATGCATT   |
| TAF6_20 | CTCGATGCTCAGCCAATGAGCTTTGAGGTTACACTCGGACCTCGTCGACATGCATT  |
| TAF6_21 | GGCTCGACATTCTTTAGCTTCAAGGCGTATTACACTCGGACCTCGTCGACATGCATT |
| TAF6_22 | CAATGTCACTGGTGGTGAGCTTCTGCCTTACACTCGGACCTCGTCGACATGCATT   |
| TAF6_23 | CTGTGCGATCTCTTTGATGCGGTAGCTGTTACACTCGGACCTCGTCGACATGCATT  |
| TAF6_24 | CTCATCCGTTAGCAGCTGGCAGGTCTTTACACTCGGACCTCGTCGACATGCATT    |

### TAF9 probes

| Name    | Probe Sequence (including FLAPY Sequence)                    |
|---------|--------------------------------------------------------------|
| TAF9_1  | CCAACACTTAACCGCGGGACTGTTATTCTTTACACTCGGACCTCGTCGACATGCATT    |
| TAF9_2  | CGGCACTGGATTGCCAATCGCACATCTTACACTCGGACCTCGTCGACATGCATT       |
| TAF9_3  | CTGCATCAACAGTAGCTTTCTTAGCATGGTTACACTCGGACCTCGTCGACATGCATT    |
| TAF9_4  | TTTGCATCATCTAGAATTGTGGTCACATATCGTTACACTCGGACCTCGTCGACATGCATT |
| TAF9_5  | ACTCCATGATATCCGATGATCAGACTTCTTTACACTCGGACCTCGTCGACATGCATT    |
| TAF9_6  | TGAGGGACATGGGAGTCCCTACTTTAGTTGTTACACTCGGACCTCGTCGACATGCATT   |
| TAF9_7  | ACAGACATGGTCTGTGGGGTTGGTGTGCTTACACTCGGACCTCGTCGACATGCATT     |
| TAF9_8  | AGTGTGGGAGTACTTGGTCTGCTAGTAACTGTTACACTCGGACCTCGTCGACATGCATT  |
| TAF9_9  | GTTGATGCCTTTTTCTGTAAAGATTCAGCCTTTACACTCGGACCTCGTCGACATGCATT  |
| TAF9_10 | AAGGGGTTTGATTTCTTTGCCTTGCAATATCTTTACACTCGGACCTCGTCGACATGCATT |
| TAF9_11 | ATTTGTGCCATCATCTGTGCATCTTTCGTTACACTCGGACCTCGTCGACATGCATT     |

|         |                                                               |
|---------|---------------------------------------------------------------|
| TAF9_12 | ATGCTCTTGGGAGAAGCCGTCTTGCCTTACACTCGGACCTCGTCGACATGCATT        |
| TAF9_13 | GATTTTGACGCAAGTTCTTTGCCTAGTGTGGTTTACACTCGGACCTCGTCGACATGCATT  |
| TAF9_14 | AGACCAAGTATACATGTTACATTCAGCAAGGCTTACACTCGGACCTCGTCGACATGCATT  |
| TAF9_15 | TGGATTAATCAGAACATTCTGAACTGCTGAGGTTACACTCGGACCTCGTCGACATGCATT  |
| TAF9_16 | GCAGGAATTGAAGCTTTTACAGCTGGAGACTTTACACTCGGACCTCGTCGACATGCATT   |
| TAF9_17 | GAAGTAGGCATCTGTACTGTAAACCTTTGACCTTACACTCGGACCTCGTCGACATGCATT  |
| TAF9_18 | CAACCTAGGACCTGAATATGGCTTGATCAATTTACACTCGGACCTCGTCGACATGCATT   |
| TAF9_19 | AGGCAAACCTCCAACATCTGATTTATAACTCTTTTACACTCGGACCTCGTCGACATGCATT |
| TAF9_20 | AGCTAAATCACCCACATTAATGTATTTTACACTCGGACCTCGTCGACATGCATT        |
| TAF9_21 | ACTGTTTGTGAAATACTACTTATCACACTGCGTTACACTCGGACCTCGTCGACATGCATT  |
| TAF9_22 | CCACCTTCTGCCTTTCCTTTTATTTTTGAGATTACACTCGGACCTCGTCGACATGCATT   |

### CTNNB1 probes<sup>10</sup>

| Name       | Probe Sequence (including FLAPY Sequence)                   |
|------------|-------------------------------------------------------------|
| CTNNB1_P01 | CTCATGTTCCATCATGGGGTCCATACCTTACACTCGGACCTCGTCGACATGCATT     |
| CTNNB1_P02 | GCATCCTGGCCATATCCACCAGAGTGTTACACTCGGACCTCGTCGACATGCATT      |
| CTNNB1_P03 | TGTTCTGAAGAGAGAGCTGGTCAGCTCAACTTTACACTCGGACCTCGTCGACATGCATT |
| CTNNB1_P04 | GCCGTTTCTTGTAATCTTGTGGCTTGTCCCTTACACTCGGACCTCGTCGACATGCATT  |
| CTNNB1_P05 | AGCTGTGGCTCCCTCAGCTTCAATAGTTACACTCGGACCTCGTCGACATGCATT      |
| CTNNB1_P06 | TGCAGCTTCCTTGTCCCTGAGCAAGTTCATTACACTCGGACCTCGTCGACATGCATT   |

|                |                                                                  |
|----------------|------------------------------------------------------------------|
| CTNNB1_<br>P07 | GAGCTAGGATGTGAAGGGCTCCGGTACAACCTTACACTCGGACCTCG<br>TCGACATGCATT  |
| CTNNB1_<br>P08 | AAATTGCTGCTGTGTCCCACCCATGGTTACACTCGGACCTCGTCGAC<br>ATGCATT       |
| CTNNB1_<br>P09 | GGCCAGTGGGATGGTGGGTGTAAGAGCTTACACTCGGACCTCGTCG<br>ACATGCATT      |
| CTNNB1_<br>P10 | TGGGCCATCTCTGCTTCTTGGTGTGTTACACTCGGACCTCGTCGAC<br>ATGCATT        |
| CTNNB1_<br>P11 | TGATGTCTTCCCTGTCACCAGCCCGATTACACTCGGACCTCGTCGAC<br>ATGCATT       |
| CTNNB1_<br>P12 | GTCCCAAGGAGACCTTCCATCCCTTCTTACACTCGGACCTCGTCGAC<br>ATGCATT       |
| CTNNB1_<br>P13 | AGCACCTTCAGCACTCTGCTTGTGGTTTACACTCGGACCTCGTCGAC<br>ATGCATT       |
| CTNNB1_<br>P14 | ACCACTAGCCAGTATGATGAGCTTGCTTTTTACACTCGGACCTCGTC<br>GACATGCATT    |
| CTNNB1_<br>P15 | TTGTTTTGTTGAGCAAGGCAACCATTTTCTGCTTACACTCGGACCTC<br>GTCGACATGCATT |
| CTNNB1_<br>P16 | TGGGAAAGGTTATGCAAGGTCCCAGCGGTATTACACTCGGACCTCG<br>TCGACATGCATT   |
| CTNNB1_<br>P17 | ATAGCGTGTCTGGAAGCTTCCTTTTTAGAAAGTTACACTCGGACCTC<br>GTCGACATGCATT |
| CTNNB1_<br>P18 | TGGTCCTCGTCATTTAGCAGTTTTGTCAGTTCTTACACTCGGACCTCG<br>TCGACATGCATT |
| CTNNB1_<br>P19 | ATTGCACGTGTGGCAAGTTCTGCATCATCTTACACTCGGACCTCGTC<br>GACATGCATT    |
| CTNNB1_<br>P20 | ATGGTTCAGCCAAACGCTGGACATTAGTGGTTACACTCGGACCTCGT<br>CGACATGCATT   |
| CTNNB1_<br>P21 | GTCCATCAATATCAGCTACTTGTTCTTGAGTGTTACACTCGGACCTC<br>GTCGACATGCATT |
| CTNNB1_<br>P22 | CTTGGGAGGTATCCACATCCTCTTCCTTACACTCGGACCTCGTCGA<br>CATGCATT       |
| CTNNB1_<br>P23 | ATTGCCTTTACCACTCAGAGAAGGAGCTGTTTACACTCGGACCTCGT<br>CGACATGCATT   |
| CTNNB1_<br>P24 | GTGGCACCAGAATGGATTCCAGAGTCCAGTTACACTCGGACCTCGTC<br>GACATGCATT    |

## Supplementary References

1. Bardot, P., et al., The TAF10-containing TFIID and SAGA transcriptional complexes are dispensable for early somitogenesis in the mouse embryo. *Development* **2017**, *144* (20), 3808-3818.
2. Wiczorek, E., et al., Function of TAF(II)-containing complex without TBP in transcription by RNA polymerase II. *Nature* **1998**, *393* (6681), 187-91.
3. Mohan, W. S., Jr., et al., TAF10 (TAF(II)30) is necessary for TFIID stability and early embryogenesis in mice. *Mol Cell Biol* **2003**, *23* (12), 4307-18.
4. Brou, C., et al., Distinct TFIID complexes mediate the effect of different transcriptional activators. *Embo j* **1993**, *12* (2), 489-99.
5. Choukrallah, M. A., et al., Interconversion between active and inactive TATA-binding protein transcription complexes in the mouse genome. *Nucleic Acids Res* **2012**, *40* (4), 1446-59.
6. Zhao, Y., et al., A TFIIIC/STAGA module mediates histone H2A and H2B deubiquitination, coactivates nuclear receptors, and counteracts heterochromatin silencing. *Mol Cell* **2008**, *29* (1), 92-101.
7. Nagy, Z., et al., The metazoan ATAC and SAGA coactivator HAT complexes regulate different sets of inducible target genes. *Cellular and molecular life sciences : CMLS* **2010**, *67* (4), 611-28.
8. Jacq, X., et al., Human TAFII30 is present in a distinct TFIID complex and is required for transcriptional activation by the estrogen receptor. *Cell* **1994**, *79* (1), 107-17.
9. May, M., et al., Human TAF(II28) promotes transcriptional stimulation by activation function 2 of the retinoid X receptors. *Embo j* **1996**, *15* (12), 3093-104.
10. Tsanov, N., et al., smiFISH and FISH-quant - a flexible single RNA detection approach with super-resolution capability. *Nucleic Acids Res* **2016**, *44* (22), e165.
